# Supplementary material
Source: HighWire-hosted journal article supplement (https://www.cmajopen.ca/highwire/filestream/81285/field_highwire_adjunct_files/2/2019-0179-3-at.pdf)
Supplement: 2019-0179-3-at.pdf [file 2019-0179-3-at.pdf]

**Appendix 3 (as supplied by the authors): Physician Assessment Form for IGAP RCT**

**DATE:**

**PATIENT NAME AND ID:**

**PHYSICIAN NAME:**

**DECISIONAL CONFLICT ANALYSIS**

As it relates to your patient’s preference for medical treatment when they are seriously ill, I want to ask you some questions about your assessment of how much conflict the patient has related to this decision. Please answer the following questions.

|                                                                                                                       | <b>Yes</b>               | <b>Probably Yes</b>      | <b>Unsure</b>            | <b>Probably No</b>       | <b>No</b>                |
|-----------------------------------------------------------------------------------------------------------------------|--------------------------|--------------------------|--------------------------|--------------------------|--------------------------|
| <b>Does your patient know the benefits and risks of each option?</b>                                                  | <input type="checkbox"/> | <input type="checkbox"/> | <input type="checkbox"/> | <input type="checkbox"/> | <input type="checkbox"/> |
| <b>Is the patient clear about which benefits and risks matter most to them?</b>                                       | <input type="checkbox"/> | <input type="checkbox"/> | <input type="checkbox"/> | <input type="checkbox"/> | <input type="checkbox"/> |
| <b>Does the patient have enough support and advice from their family to make a choice?</b>                            | <input type="checkbox"/> | <input type="checkbox"/> | <input type="checkbox"/> | <input type="checkbox"/> | <input type="checkbox"/> |
| <b>Does the patient have enough support and information from the medical team/primary care team to make a choice?</b> | <input type="checkbox"/> | <input type="checkbox"/> | <input type="checkbox"/> | <input type="checkbox"/> | <input type="checkbox"/> |
| <b>Does the patient feel SURE about the best choice for them?</b>                                                     | <input type="checkbox"/> | <input type="checkbox"/> | <input type="checkbox"/> | <input type="checkbox"/> | <input type="checkbox"/> |

**SATISFACTION QUESTION**

- How satisfied were you with the outcome of these discussions?

|                                     |                                   |                                                |                                |                                  |
|-------------------------------------|-----------------------------------|------------------------------------------------|--------------------------------|----------------------------------|
| <b>Completely dissatisfied</b><br>1 | <b>Somewhat dissatisfied</b><br>2 | <b>Neither satisfied nor dissatisfied</b><br>3 | <b>Somewhat satisfied</b><br>4 | <b>Completely satisfied</b><br>5 |
|-------------------------------------|-----------------------------------|------------------------------------------------|--------------------------------|----------------------------------|

**FINAL GCD (as recorded on the official document):**

R1   R2   R3   M1   M2   C1   C2   C3

Time spent with patient finalizing the Goals of Care (mins):
